# Supplementary material for: Inhibition of Nematocyst Discharge from Pelagia noctiluca (Cnidaria: Scyphozoa)—Prevention Measures against Jellyfish Stings
Source: MDPI journal article supplement (doi:10.3390/md20090571), 2022-09-08
Supplement: s1 [file s1]

## Supplementary Material

**Table S1.** ANOVA test for differences between formulation. Significance value: \*\*\*  $p < 0.001$ .

| ANOVA |        |         |         |        |              |
|-------|--------|---------|---------|--------|--------------|
| Df    | Sum Sq | Mean Sq | F value | Pr(>F) | Significance |
| 5     | 45201  | 9040    | 31.42   | <2e-16 | ***          |
| 92    | 26467  | 288     |         |        |              |

**Table S2.** Pair wise tests for differences between formulation. Significance values: \*\*\*  $p < 0.001$ .

| Formulations                                                     | 1.5%                        |                                                                |                                     |                          |
|------------------------------------------------------------------|-----------------------------|----------------------------------------------------------------|-------------------------------------|--------------------------|
|                                                                  | 10% Lidocaine<br>in ethanol | Hydroxyacetophenone in<br>distilled water + butylene<br>glycol | 3% Symsitive® in<br>butylene glycol | Butylene glycol          |
| 1.5% Hydroxyacetophenone in<br>distilled water + butylene glycol | 100.000                     | -                                                              | -                                   | -                        |
| 3% Symsitive® in butylene glycol                                 | 0.04754***                  | 0.03893***                                                     | -                                   | -                        |
| Butylene glycol                                                  | 0.00159***                  | 0.00110***                                                     | 0.89229                             | -                        |
| Seawater                                                         | $5.8 \times 10^{-15}$ ***   | $3.2 \times 10^{-15}$ ***                                      | $2.6 \times 10^{-9}$ ***            | $7.4 \times 10^{-7}$ *** |
